# Supplementary material for: Withdrawal from Extended, Intermittent Access to A Highly Palatable Diet Impairs Hippocampal Memory Function and Neurogenesis: Effects of Memantine
Source: PubMed Central journal article supplement (PMC7284648; doi:10.3390/nu12051520), 2020-05-23
Supplement: nutrients-12-01520-s001.pdf [file nutrients-12-01520-s001.pdf]

1 Research Manuscript

2 **Withdrawal from extended, intermittent access to a**  
 3 **highly palatable diet impairs hippocampal memory**  
 4 **function and neurogenesis: effects of memantine**

5 Antonio Ferragud <sup>1</sup>, Clara Velázquez-Sánchez <sup>1</sup>, Ali Al Abdullatif <sup>1</sup>, Valentina Sabino <sup>1</sup> and  
 6 Pietro Cottone <sup>1,\*</sup>

7 <sup>1</sup> Laboratory of Addictive Disorders, Departments of Pharmacology and Psychiatry, Boston University  
 8 School of Medicine, Boston, MA, USA

9 \* Correspondence: cottone@bu.edu; 001-617-358-1950

10

11 **Supplementary Figure S1**

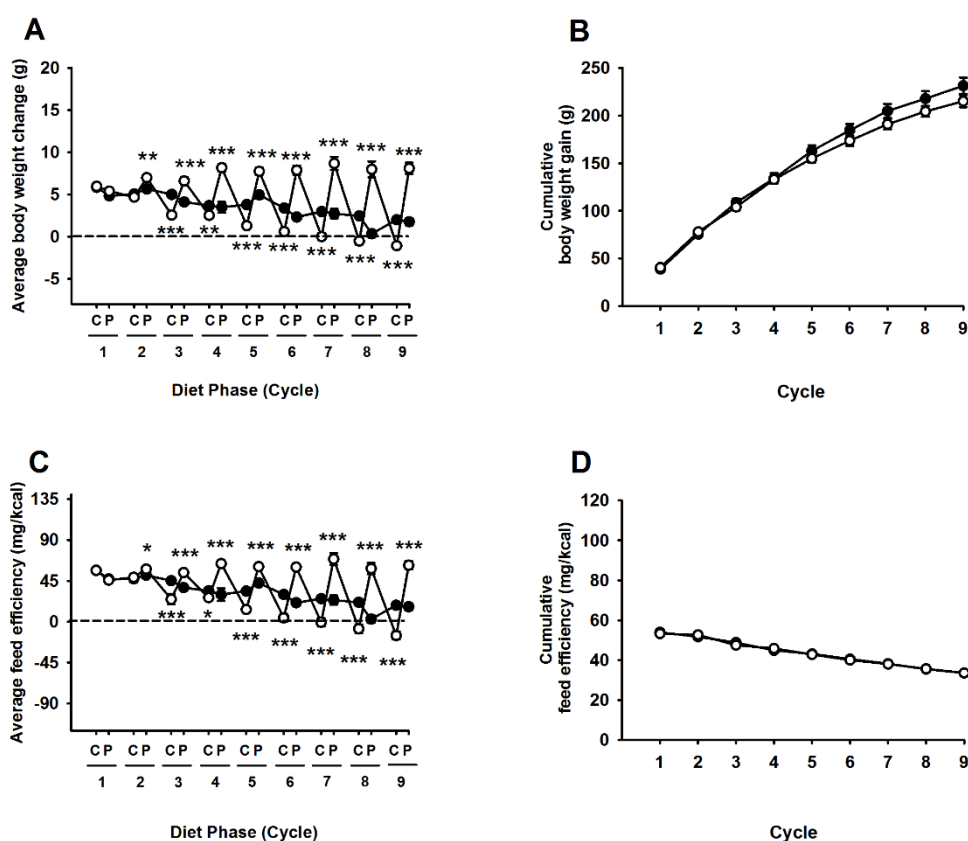

12

13

14

15

16

17

18

**Figure 5.** Effects of repeated, alternating 5-day access to chow and 2-day access to either chow (Chow/Chow) or highly preferred chocolate-flavored sugary diet (Chow/Palatable) on (A) average body weight change, (B) cumulative body weight gain, (C) Average feed efficiency, and (D) cumulative feed efficiency, (n=19-20/group). Data show M±SEM. \* p≤0.05, \*\* p≤0.01, \*\*\* p≤0.001 vs. Chow/Chow.
